# Supplementary material
Source: MDPI journal article supplement (https://www.mdpi.com/2073-4344/11/1/138)
Supplement: s1 [file s1]

# Supplementary Materials: Improving Product Yield in the Direct Carboxylation of Glycerol with CO<sub>2</sub> through the Tailored Selection of Dehydrating Agents

Nurul Razali <sup>1,2</sup> and James McGregor <sup>2,\*</sup>

<sup>1</sup> Faculty of Ocean Engineering Technology and Informatics, Universiti Malaysia Terengganu, 21300 Kuala Terengganu, Malaysia; nrzali01@gmail.com

<sup>2</sup> Department of Chemical and Biological Engineering, University of Sheffield, Mappin Street, Sheffield S1 3JD, UK

\* Correspondence: james.mcgregor@sheffield.ac.uk; Tel.: +44-114-222-4918

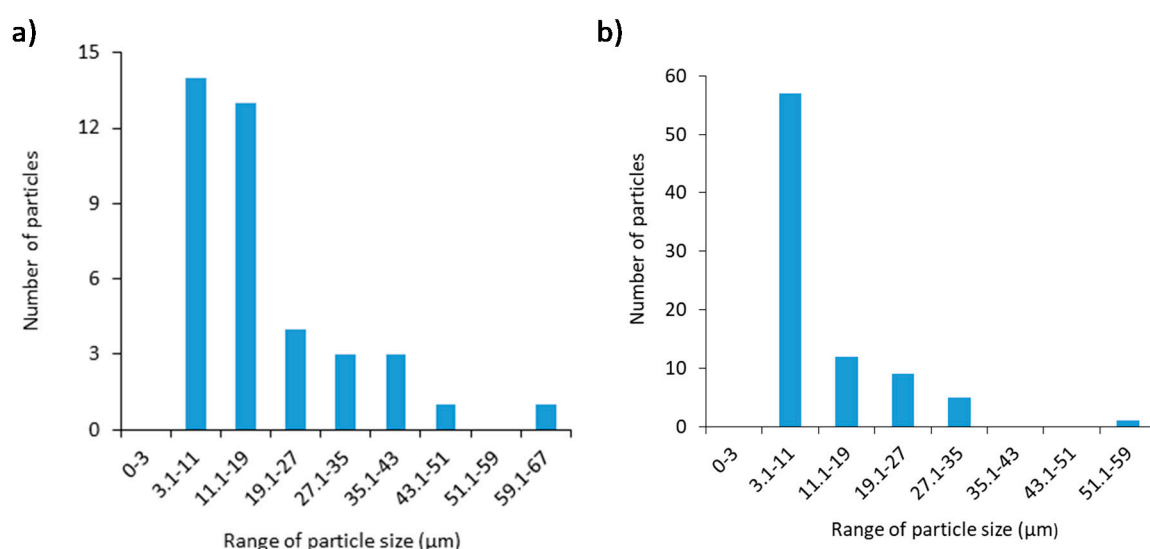

**Figure S1.** Particle size distributions for (a) CP-La<sub>2</sub>O<sub>2</sub>CO<sub>3</sub> and (b) HT-La<sub>2</sub>O<sub>2</sub>CO<sub>3</sub> determined from analysis of multiple SEM micrographs.

**Table S1.** Mass spectrometry fragmentation pattern of unidentified by-product (chromatogram retention time = 35.5 min) from the carboxylation of glycerol in the presence of benzonitrile as a dehydrating agent. Reaction conditions: reaction pressure = 45 bar, 6 wt.% La<sub>2</sub>O<sub>3</sub> to glycerol ratio, 22.5 mmol glycerol, 45 mmol benzonitrile, 18 h and reaction temperature = 160 °C.

| m/z | Relative Intensity |
|-----|--------------------|
| 105 | 100                |
| 45  | 57.3               |
| 77  | 42.91              |
| 123 | 19.5               |
| 89  | 15.95              |
| 43  | 15.44              |
| 44  | 14.92              |
| 51  | 13.94              |
| 73  | 9.47               |
| 87  | 9.35               |
| 165 | 9.18               |
| 59  | 8.9                |
| 74  | 7.82               |
| 106 | 7.24               |
| 136 | 5.62               |
| 92  | 5.15               |

58

5.06

**Table S2.** Influence of the dehydrating agents on by-product formation. Reaction conditions: reaction pressure = 45 bar, 6 wt.%  $\text{La}_2\text{O}_3$  to glycerol ratio, 22.5 mmol glycerol, 45 mmol dehydrating agents, 18 h and reaction temperature = 160 °C. The by-products detected from the reaction were measured qualitatively, value shown in the table correspond to chromatogram peak area ( $\times 10^5$ ).

| Products                 | Adiponitrile | Acetonitrile | Benzonitrile | Acetic anhydride |
|--------------------------|--------------|--------------|--------------|------------------|
| 4HMO                     | 2            | 6            | 3            | 0                |
| Unknown 1 (minute 30.8)  | 2            | 10           | 0            | 0                |
| Unknown 2 (minute 31.3)  | 4            | 3            | 0            | 0                |
| Unknown 3 (minute 33.9)  | 2            | 0            | 0            | 0                |
| Unknown 4 (minutes 35.5) | 0            | 0            | 21           | 0                |

**Table S3.** Influence of catalyst synthesis method on by-product formation. Reaction conditions: reaction pressure = 45 bar, 6 wt.% catalyst to glycerol ratio, 22.5 mmol glycerol, 45 mmol adiponitrile, 18 h and reaction temperature = 160 °C. The by-products detected from the reaction were measured qualitatively, value shown in the table correspond to chromatogram peak area ( $\times 10^5$ ).

| Products                | $\text{La}_2\text{O}_3\text{-C}$ | $\text{La}_2\text{O}_3\text{CO}_3\text{-CP}$ | $\text{La}_2\text{O}_3\text{CO}_3\text{-HT}$ | $\text{La}_2\text{O}_3\text{CO}_3\text{-SG}$ |
|-------------------------|----------------------------------|----------------------------------------------|----------------------------------------------|----------------------------------------------|
| 4HMO                    | 2                                | 5                                            | 13                                           | 2                                            |
| Unknown 1 (minute 30.8) | 2                                | 10                                           | 14                                           | N/A                                          |
| Unknown 2 (minute 31.3) | 4                                | 21                                           | 9                                            | N/A                                          |
| Unknown 3 (minute 33.9) | 2                                | 8                                            | 17                                           | N/A                                          |
